# Supplementary material for: Overexpression of PpSnRK1α in Tomato Increased Autophagy Activity under Low Nutrient Stress
Source: MDPI journal article supplement (doi:10.3390/ijms23105464), 2022-05-13
Supplement: s1 [file s1]

Table S1: Primers used in this study

| Gene                | Forward sequence (5'-3') | Reverse sequence (5'-3') |
|---------------------|--------------------------|--------------------------|
| <i>PpSlSnRK1α</i>   | GAGGTGGTTAAGATGGGAT      | TCAGCTCCAAGATAGCCA       |
| <i>Actin SIEF1α</i> | TGGAAACGGATATGCCCCTG     | TGGGCTTGGTGGGAATCATC     |
| <i>SlSnRK2.1</i>    | CAGTTTGAGGAGCCAGATCA     | GTCATCGTCAATGTCCAAGC     |
| <i>SlSnRK2.2</i>    | AGCTGATGGATGTTGAGCAC     | GCAGGATCTTTCCCTTCAGA     |
| <i>SlSnRK2.3</i>    | GAAGAACCCGATCAACCAAT     | CAGGCTCTGAATCCAAGTCA     |
| <i>SlSnRK2.4</i>    | GATGATGAAATTGACACAAGTGG  | CATGGCTTGAACGTGTATGA     |
| <i>SlSnRK2.5</i>    | CAATGGCATAACCACAATCCT    | AGGGCTTCGCTTTGTAGTTG     |
| <i>SlSnRK2.6</i>    | GGAAGTATGGAAGGAGGAA      | CCTGCAGAGGAACTCTAGCC     |
| <i>SlSnRK2.7</i>    | CAATGCAGGAAGGTTCAAGTG    | GAGCTGCACTTCCATCAAGA     |
| <i>SlATG1a</i>      | GATCGTTACGGCTCGGCTTA     | CTTCAAGGTGGAGCGGTCAT     |
| <i>SlATG2</i>       | AGCAGCGGATGCTAACCTTT     | GACGGGACTCAGACAGCAAA     |
| <i>SlATG3</i>       | TCACAGCTTCACGGAGCATT     | ATTCGCTGACGCTGAGAACA     |
| <i>SlATG4</i>       | TGGGGTTGCATGCTTAGGAG     | CAAGCGGCTGATTGTGCATT     |
| <i>SlATG5</i>       | CCTGAACGGCCTTGGAATCT     | CCATAATGGAGCGCCAGAGT     |
| <i>SlATG6</i>       | GCTACACCGGATAAGGGTCG     | GCATCCCGGAGCGATAAGAA     |
| <i>SlATG7</i>       | AGTCGGTGGCTTCCTAGTCT     | GGGTACGGTTAGCCGTTGAA     |
| <i>SlATG8c</i>      | TGCGGAAGAGGATCAAGCTC     | TTCCAAGCTCAACGAACCCA     |
| <i>SlATG9</i>       | TCAACAGCAGTGCCGTACAT     | TGTTATTGCAGCCCGGCTTA     |
| <i>SlATG10</i>      | TATACTGCGCAGGAACTGGC     | GTACCATGGCCGATTTCAGGT    |
| <i>SlATG12</i>      | TGGCGATGCTCCGATTCTTA     | CTCCCTATGGAGTTGACGGC     |
| <i>SlATG13</i>      | CTGCCCATTCACCACAAAGC     | CAAACGAGTCTGCCCAGGAT     |
| <i>SlATG18b</i>     | GTCATCGTCAATGTCCAAGC     | CACGTGTTCAAGGTGTTGCTG    |
